# Supplementary material
Source: Springer Nature journal article supplement (https://www.springermedizin.de/resource/supplementary/12936_2010_1747_MOESM1_ESM.pdf/9541602)
Supplement: MOESM1 [file 9541602]

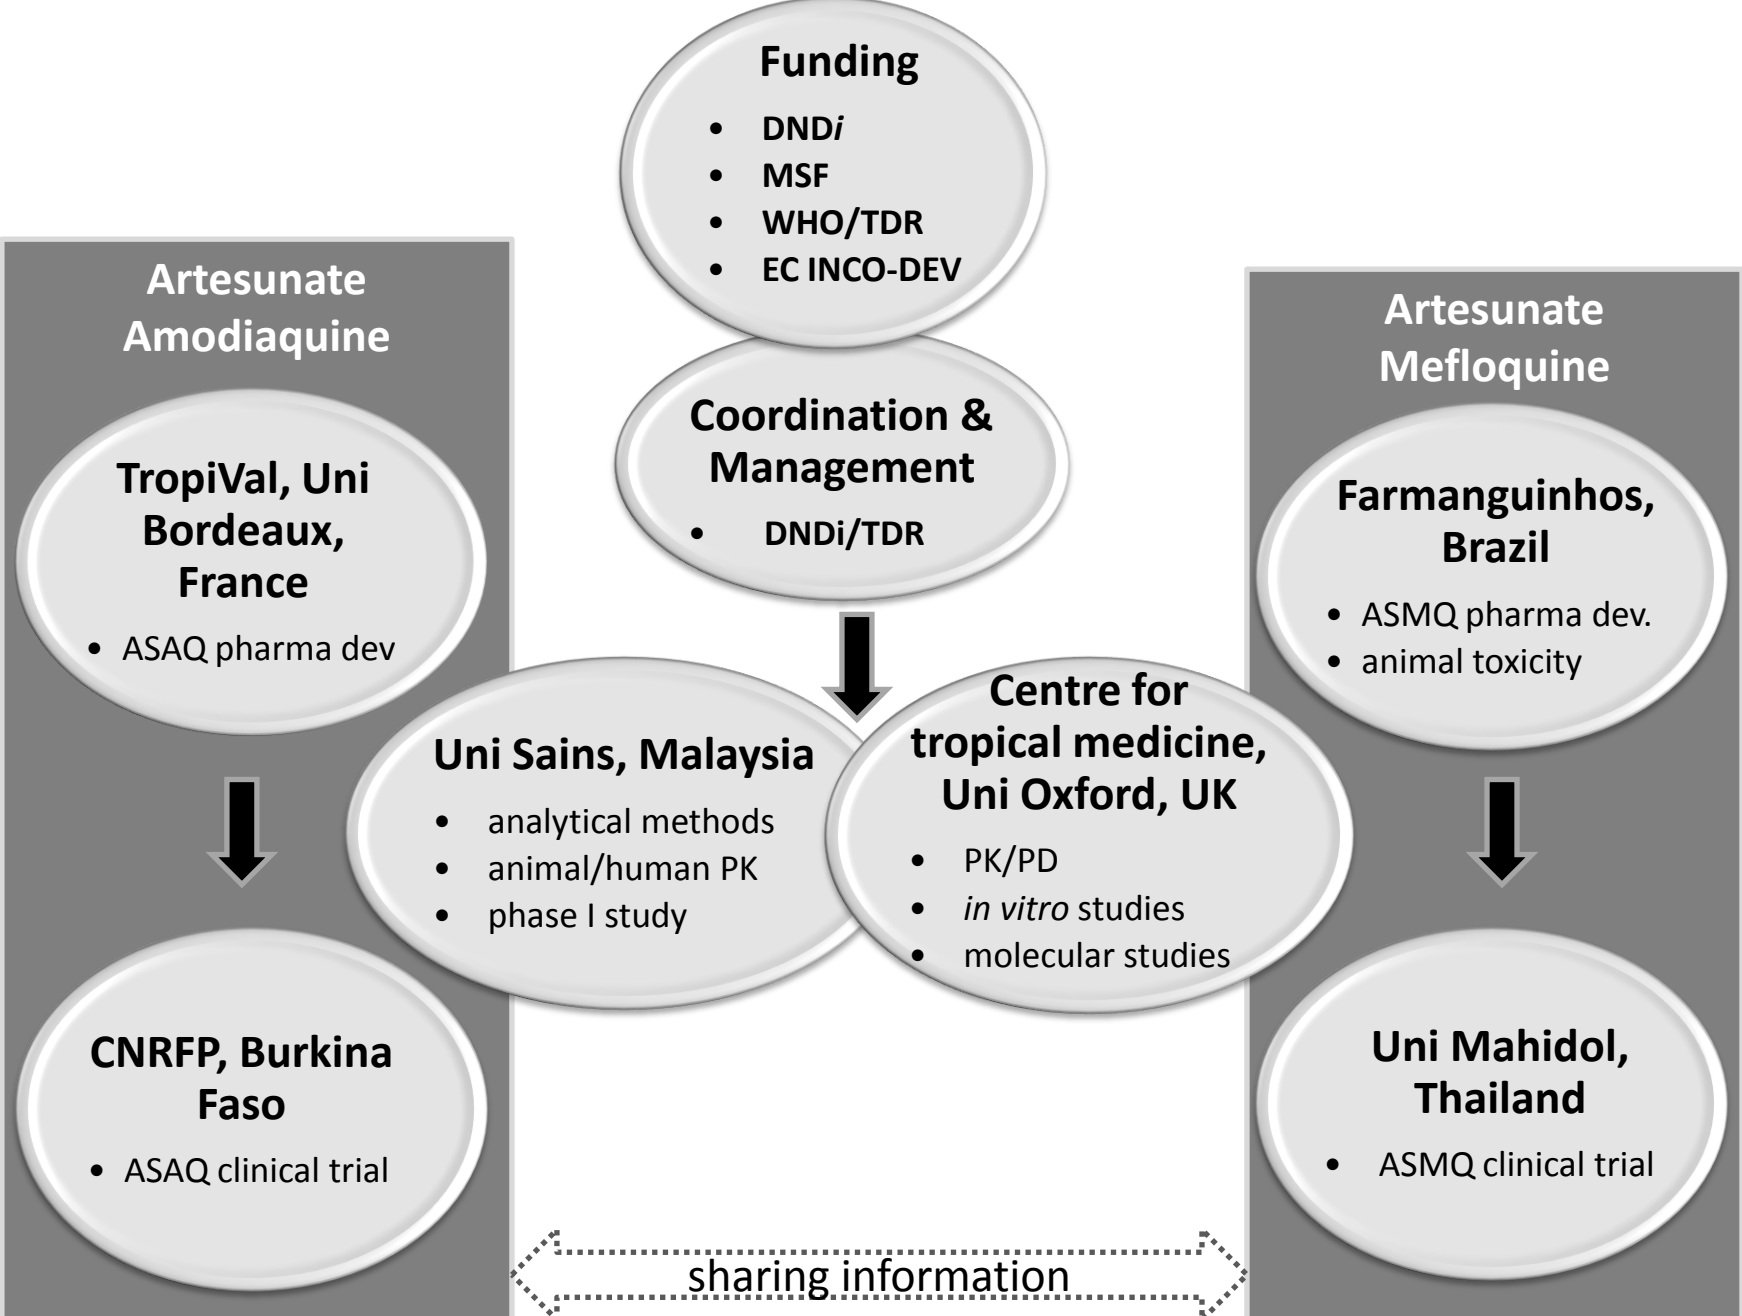

**Funding**

- DNDi
- MSF
- WHO/TDR
- EC INCO-DEV

**Coordination & Management**

- DNDi/TDR

**Artesunate Amodiaquine**

**TropiVal, Uni Bordeaux, France**

- ASAQ pharma dev

**Artesunate Mefloquine**

**Farmanguinhos, Brazil**

- ASMQ pharma dev.
- animal toxicity

**Uni Sains, Malaysia**

- analytical methods
- animal/human PK
- phase I study

**Centre for tropical medicine, Uni Oxford, UK**

- PK/PD
- *in vitro* studies
- molecular studies

**CNRFP, Burkina Faso**

- ASAQ clinical trial

**Uni Mahidol, Thailand**

- ASMQ clinical trial

sharing information
